# Supplementary material
Source: PubMed Central journal article supplement (PMC8283560)

## Supplemental Online Content

Gal R, van Velzen SGM, Hoening MJ, et al. Identification of risk of cardiovascular disease by automatic quantification of coronary artery calcifications on radiotherapy planning CT scans in patients with breast cancer. Published online May 6, 2021. *JAMA Oncol*. doi:10.1001/jamaoncol.2021.1144

**eMethods.** Coronary artery calcium scoring

**eTable 1.** ICD-10 codes used to identify patients that experienced a cardiovascular event

**eTable 2.** Number of hospitalizations of cardiovascular disease and deaths by CAC score category during a median follow-up of 4.3 years

**eTable 3.** Number of hospitalizations for other heart diseases (I30-49, I51) during a median follow-up of 4.3 years

**eTable 4.** Risk of cardiovascular disease by  $\log(\text{CAC}+1)$

**eTable 5.** Risk of coronary artery disease by CAC score category, stratified by treatment

**eTable 6.** Risk of all-cause mortality by CAC score category, stratified by treatment (follow-up until 2018)

**eTable 7.** Number of hospitalizations of cardiovascular disease and deaths by CAC score category in patients without and with CVD hospitalization before the radiotherapy planning CT scan

**eTable 8.** Risk of cardiovascular disease by CAC score category in patients without known cardiovascular disease before the radiotherapy planning CT scan

**eTable 9.** Competing risks survival analysis of cardiovascular disease by CAC category

**eFigure 1.** Cumulative incidence curves for CVD by CAC category in the presence of competing risks (Aalen-Johansen estimates and 95% intervals)

This supplemental material has been provided by the authors to give readers additional information about their work.

Figure 1. Workflow of automatic CAC scoring and score computation. First, CAC is automatically identified and segmented using the deep learning calcium scoring algorithm. Second, CAC scores are computed using the Agatston scoring method.

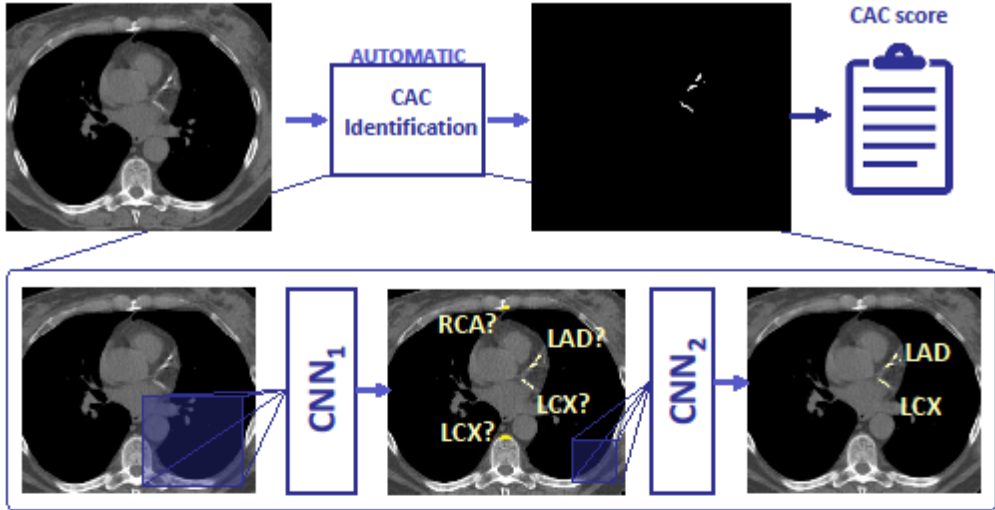

Figure 2. Examples of CAC lesions in different coronary arteries identified by the deep learning algorithm. The position of the slices within the heart is indicated in the coronal view.

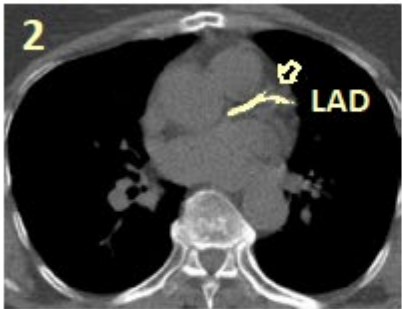

Axial view

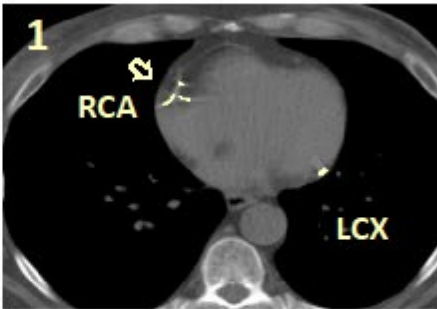

Axial view

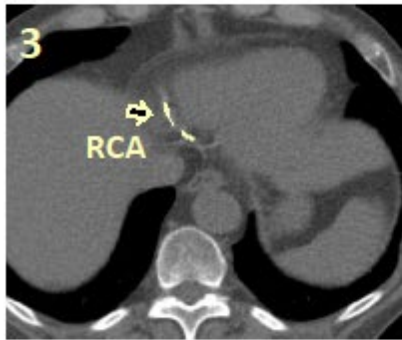

Axial view

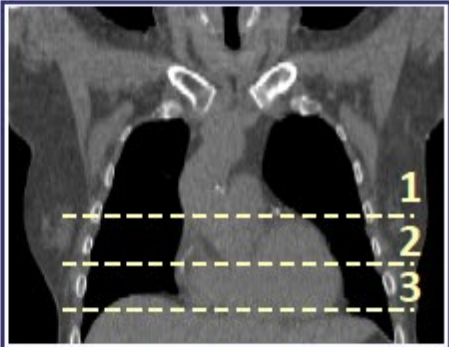

Coronal view

**eTable 1 ICD-10 codes used to identify patients that experienced a cardiovascular event**

| <b>Diagnosis</b>                                           | <b>ICD-10 codes</b>                                                                                               |
|------------------------------------------------------------|-------------------------------------------------------------------------------------------------------------------|
| <b>Any CVD event</b>                                       | I00-199<br>except I88-I89 (lymphedema) and I83-86 (varicose veins)                                                |
| <b>Coronary artery disease</b>                             | I20-25<br>(e.g. myocardial infarction and angina pectoris)                                                        |
| <b>Heart failure</b>                                       | I50                                                                                                               |
| <b>Other heart disease</b>                                 | I30-49, I51<br>(e.g. pericarditis, endocarditis, myocarditis, cardiomyopathy, atrial fibrillation and arrhythmia) |
| <b>Cerebrovascular diseases</b>                            | I60-69<br>(e.g. hemorrhage and cerebral infarction)                                                               |
| <b>Disease of the arteries, arterioles and capillaries</b> | I80-82, I87, I95-97<br>(e.g. thrombosis and hypotension)                                                          |

**eTable 2 Number of hospitalizations of cardiovascular disease and deaths by CAC score category during a median follow-up of 4.3 years**

|                                                        | Total<br>(n =<br>15,915) | CAC score (Agatston units) |                     |                       |                      |                   |
|--------------------------------------------------------|--------------------------|----------------------------|---------------------|-----------------------|----------------------|-------------------|
|                                                        |                          | 0<br>(n =<br>11,179)       | 1-10<br>(n = 1,584) | 11-100<br>(n = 1,825) | 101-400<br>(n = 830) | >400<br>(n = 497) |
| <b>Hospital admission, n (%)</b>                       |                          |                            |                     |                       |                      |                   |
| Any cardiovascular disease                             | 1,341 (8.4)              | 643 (5.8)                  | 146 (9.2)           | 260 (14.3)            | 154 (18.6)           | 138 (27.8)        |
| Coronary artery disease                                | 336 (2.1)                | 127 (1.1)                  | 37 (2.3)            | 70 (3.8)              | 51 (6.1)             | 51 (10.3)         |
| Heart failure                                          | 185 (1.2)                | 84 (0.8)                   | 15 (0.9)            | 34 (1.9)              | 27 (3.3)             | 25 (5.0)          |
| Other heart diseases                                   | 497 (3.1)                | 256 (2.3)                  | 54 (3.4)            | 95 (5.2)              | 51 (6.1)             | 41 (8.2)          |
| Cerebrovascular diseases                               | 199 (1.3)                | 82 (0.7)                   | 27 (1.7)            | 50 (2.7)              | 24 (2.9)             | 16 (3.2)          |
| Disease of the arteries,<br>arterioles and capillaries | 122 (0.8)                | 43 (0.4)                   | 6 (0.4)             | 26 (1.4)              | 25 (3.0)             | 22 (4.4)          |
| <b>Death, n (%)</b>                                    |                          |                            |                     |                       |                      |                   |
| All-causes                                             | 1,172 (7.4)              | 617 (5.5)                  | 152 (9.6)           | 174 (9.5)             | 118 (14.2)           | 111 (22.3)        |
| Any cardiovascular disease                             | 113 (0.7)                | 28 (0.3)                   | 16 (1.0)            | 23 (1.3)              | 18 (2.2)             | 28 (5.6)          |
| Any cancer (including<br>breast cancer)                | 804 (5.1)                | 481 (4.3)                  | 108 (6.8)           | 107 (5.9)             | 56 (6.7)             | 52 (10.5)         |
| Breast cancer                                          | 587 (3.7)                | 374 (3.3)                  | 76 (4.8)            | 68 (3.7)              | 37 (4.5)             | 32 (6.4)          |

Cardiovascular disease was defined by ICD-10 codes I00-199, lymphedema and varicose veins excluded (I88-89 and I83-86 respectively)

Coronary artery disease was defined by ICD-10 codes I20-25, including angina pectoris and myocardial infarction

Heart failure was defined by ICD-10 code I50

Other heart diseases was defined by ICD-10 codes I30-49 and I51, including pericarditis, endocarditis, myocarditis, cardiomyopathy and arrhythmia

Cancer was defined by ICD-10 codes C00-99, non-melanoma skin cancer excluded (C44)

Breast cancer was defined by ICD-10 code 50

**eTable 3 Number of hospitalizations for other heart diseases (I30-49, I51) during a median follow-up of 4.3 years**

| <b>ICD-10 code</b> | <b>Diagnosis</b>                                            | <b>N (%)</b> |
|--------------------|-------------------------------------------------------------|--------------|
| I30                | Acute pericarditis                                          | - (<1)       |
| I31                | Other diseases of pericardium                               | 11 (2)       |
| I33                | Acute and subacute endocarditis                             | 11 (2)       |
| I34                | Nonrheumatic mitral valve disorders                         | 20 (3)       |
| I35                | Nonrheumatic aortic valve disorders                         | 54 (9)       |
| I38                | Endocarditis, valve unspecified                             | 11 (2)       |
| I42                | Cardiomyopathy                                              | 30 (5)       |
| I44                | Atrioventricular and left bundle-branch block               | 29 (5)       |
| I45                | Other conduction disorders                                  | 12 (2)       |
| I46                | Cardiac arrest                                              | 16 (3)       |
| I47                | Paroxysmal tachycardia                                      | 42 (7)       |
| I48                | Atrial fibrillation and flutter                             | 276 (46)     |
| I49                | Other cardiac arrhythmias                                   | 67 (11)      |
| I51                | Complications and ill-defined descriptions of heart disease | 15 (3)       |

Patients could have more than one hospitalization for other heart disease.

**eTable 4 Risk of cardiovascular disease by log(CAC+1)**

| <b>CAC score</b><br>(Agatston units) | Unadjusted         | Model 1            | Model 2            | Model 3            |
|--------------------------------------|--------------------|--------------------|--------------------|--------------------|
|                                      | <b>HR (95% CI)</b> | <b>HR (95% CI)</b> | <b>HR (95% CI)</b> | <b>HR (95% CI)</b> |
| Log(CAC+1)                           | 3.9 (3.4-4.4)      | 2.2 (1.9-2.6)      | 2.2 (2.0-2.6)      | 2.2 (1.9-2.5)      |

Model 1: adjusted for age at time of CT scan and stratified by calendar year of CT scan

Model 2: adjusted for age at time of CT scan, laterality, treated with anthracyclines and treated with trastuzumab, and stratified by calendar year of CT scan

Model 3: adjusted for age at time of CT scan, laterality, treated with anthracyclines and treated with trastuzumab, and stratified by calendar year of CT scan; model included interaction between log(CAC+1) and anthracyclines

**eTable 5 Number of hospitalizations for cardiovascular disease and deaths by CAC score category in patients without and with CVD hospitalization before the radiotherapy planning CT scan**

|                                      | Patients without pre-existing cardiovascular disease |                            |                        |                          |                         |                      | Patients with pre-existing cardiovascular disease |                            |                      |                        |                         |                      |  |
|--------------------------------------|------------------------------------------------------|----------------------------|------------------------|--------------------------|-------------------------|----------------------|---------------------------------------------------|----------------------------|----------------------|------------------------|-------------------------|----------------------|--|
|                                      |                                                      | CAC score (Agatston units) |                        |                          |                         |                      |                                                   | CAC score (Agatston units) |                      |                        |                         |                      |  |
|                                      | Total<br>(n =<br>14,501)                             | 0<br>(n =<br>10,559)       | 1-10<br>(n =<br>1,447) | 11-100<br>(n =<br>1,577) | 101-400<br>(n =<br>651) | >400<br>(n =<br>267) | Total<br>(n =<br>1,414)                           | 0<br>(n = 620)             | 1-10<br>(n =<br>137) | 11-100<br>(n =<br>248) | 101-400<br>(n =<br>179) | >400<br>(n =<br>230) |  |
| <b>Hospital admission, n (%)</b>     |                                                      |                            |                        |                          |                         |                      |                                                   |                            |                      |                        |                         |                      |  |
| Any cardiovascular disease           | 1,003 (6.9)                                          | 522 (4.9)                  | 121 (8.4)              | 199 (12.6)               | 98 (15.1)               | 63 (23.6)            | 338 (23.9)                                        | 121 (19.5)                 | 25 (18.2)            | 61 (24.5)              | 56 (31.3)               | 75 (32.6)            |  |
| Coronary artery disease              | 238 (1.6)                                            | 100 (0.9)                  | 33 (2.3)               | 55 (3.5)                 | 28 (4.3)                | 22 (8.2)             | 98 (6.9)                                          | 27 (4.4)                   | <5 (-)               | 15 (6.0)               | 23 (12.8)               | 29 (12.6)            |  |
| Heart failure                        | 120 (0.8)                                            | 61 (0.6)                   | 12 (0.8)               | 22 (1.4)                 | 14 (2.2)                | 11 (4.1)             | 65 (4.6)                                          | 23 (3.7)                   | <5 (-)               | 12 (4.8)               | 13 (7.3)                | 14 (6.1)             |  |
| Other heart diseases                 | 354 (2.4)                                            | 192 (1.8)                  | 44 (3.0)               | 63 (4.0)                 | 37 (5.7)                | 18 (6.7)             | 143 (10.1)                                        | 64 (10.3)                  | 10 (7.3)             | 32 (12.9)              | 14 (7.8)                | 23 (10.0)            |  |
| <b>Death, n (%)</b>                  |                                                      |                            |                        |                          |                         |                      |                                                   |                            |                      |                        |                         |                      |  |
| All-causes                           | 962 (6.6)                                            | 555 (5.3)                  | 128 (8.8)              | 133 (8.4)                | 87 (13.4)               | 59 (22.1)            | 210 (14.9)                                        | 62 (10.0)                  | 24 (17.5)            | 41 (16.5)              | 31 (17.3)               | 52 (22.6)            |  |
| Any cardiovascular disease           | 70 (0.5)                                             | 20 (0.2)                   | 12 (0.8)               | 16 (1.0)                 | 13 (2.0)                | 9 (3.4)              | 43 (3.0)                                          | 8 (1.3)                    | <5 (-)               | 7 (2.8)                | 5 (2.8)                 | 19 (8.3)             |  |
| Any cancer (including breast cancer) | 695 (4.8)                                            | 443 (4.2)                  | 95 (6.6)               | 85 (5.4)                 | 41 (6.3)                | 31 (11.6)            | 109 (7.7)                                         | 38 (6.1)                   | 13 (9.5)             | 22 (8.9)               | 15 (8.4)                | 21 (9.1)             |  |
| Breast cancer                        | 505 (3.5)                                            | 345 (3.3)                  | 65 (4.5)               | 52 (3.3)                 | 25 (3.8)                | 18 (6.7)             | 82 (5.8)                                          | 29 (4.7)                   | 11 (8.0)             | 16 (6.5)               | 12 (6.7)                | 14 (6.1)             |  |

Cardiovascular disease was defined by ICD-10 codes I00-199, lymphedema and varicose veins excluded (I88-89 and I83-86 respectively)

Coronary artery disease was defined by ICD-10 codes I20-25, including angina pectoris and myocardial infarction

Heart failure was defined by ICD-10 code I50

Other heart diseases was defined by ICD-10 codes I30-49 and I51, including pericarditis, endocarditis, myocarditis, cardiomyopathy and arrhythmia

Cancer was defined by ICD-10 codes C00-99, non-melanoma skin cancer excluded (C44)

Breast cancer was defined by ICD-10 code C50



**eTable 6 Risk of cardiovascular disease by CAC score category in patients without and with CVD hospitalization before the radiotherapy planning CT scan**

| <b>Patients without pre-existing cardiovascular disease</b> |               |                      |                                              |                            |
|-------------------------------------------------------------|---------------|----------------------|----------------------------------------------|----------------------------|
| <b>CAC score (Agatston units)</b>                           | <b>n (%)</b>  | <b>Events, n (%)</b> | <b>Incidence rate, per 1000 person-years</b> | <b>HR (95% CI)</b>         |
| 0                                                           | 10,559 (72.8) | 467 (4.4)            | 9.1                                          | 1.0 (ref)                  |
| 1-10                                                        | 1,447 (10.0)  | 111 (7.7)            | 15.0                                         | 1.2 (0.9-1.5)              |
| 11-100                                                      | 1,577 (10.9)  | 193 (12.2)           | 25.1                                         | 1.8 (1.5-2.2)              |
| 101-400                                                     | 651 (4.5)     | 93 (14.3)            | 33.7                                         | 1.9 (1.5-2.5)              |
| >400                                                        | 267 (1.8)     | 61 (22.8)            | 58.8                                         | 3.2 (2.4-4.3)              |
| <b>Patients with pre-existing cardiovascular disease</b>    |               |                      |                                              |                            |
| <b>CAC score (Agatston units)</b>                           | <b>n (%)</b>  | <b>Events, n (%)</b> | <b>Incidence rate, per 1000 person-years</b> | <b>HR (95% CI)</b>         |
| 0                                                           | 620 (43.8)    | 112 (18.1)           | 45.6                                         | 1.0 (ref)                  |
| 1-10                                                        | 137 (9.7)     | 27 (19.7)            | 51.0                                         | 0.8 (0.5-1.3)              |
| 11-100                                                      | 248 (17.5)    | 60 (24.2)            | 67.8                                         | 1.2 (0.9-1.7)              |
| 101-400                                                     | 179 (12.7)    | 55 (30.7)            | 89.2                                         | 1.4 (1.0-2.0) <sup>a</sup> |
| >400                                                        | 230 (16.3)    | 79 (34.3)            | 103.7                                        | 1.5 (1.1-2.0)              |

CAC = coronary artery calcium; CI = confidence interval; HR = hazard ratio

<sup>a</sup> 95% CI lower limit <1.0

Coronary artery disease included all coronary artery disease hospitalizations and death (ICD-10 codes I20-25), including angina pectoris and myocardial infarction

Models were adjusted for age at time of CT scan and stratified by calendar year of CT scan

**eTable 7 Risk of coronary artery disease by CAC score category, stratified by treatment**

| CAC score (Agatston units) | Left-sided radiotherapy (n = 8,223)   |                | Right-sided radiotherapy (n = 7,688)  |                | Radiation boost (n = 5,182)           |                            | No radiation boost (n = 5,324)        |                 | Anthracyclines (n = 4,333)            |                | No anthracyclines (n = 11,582)        |                |
|----------------------------|---------------------------------------|----------------|---------------------------------------|----------------|---------------------------------------|----------------------------|---------------------------------------|-----------------|---------------------------------------|----------------|---------------------------------------|----------------|
|                            | Incidence rate, per 1000 person-years | HR (95% CI)    | Incidence rate, per 1000 person-years | HR (95% CI)    | Incidence rate, per 1000 person-years | HR (95% CI)                | Incidence rate, per 1000 person-years | HR (95% CI)     | Incidence rate, per 1000 person-years | HR (95% CI)    | Incidence rate, per 1000 person-years | HR (95% CI)    |
| 0                          | 2.3                                   | 1.0 (ref)      | 2.0                                   | 1.0 (ref)      | 1.8                                   | 1.0 (ref)                  | 2.3                                   | 1.0 (ref)       | 1.3                                   | 1.0 (ref)      | 2.5                                   | 1.0 (ref)      |
| 1-10                       | 5.2                                   | 1.9 (1.2-3.1)  | 3.7                                   | 1.4 (0.8-2.6)  | 4.3                                   | 1.9 (0.8-4.8)              | 4.7                                   | 1.6 (0.6-3.9)   | 3.7                                   | 2.4 (0.9-6.6)  | 4.7                                   | 1.6 (1.1-2.4)  |
| 11-100                     | 9.7                                   | 3.4 (2.3-5.0)  | 6.7                                   | 2.3 (1.4-3.6)  | 6.8                                   | 2.7 (1.2-6.1)              | 7.8                                   | 2.8 (1.4-5.6)   | 6.4                                   | 3.6 (1.5-8.6)  | 8.5                                   | 2.8 (2.0-3.8)  |
| 101-400                    | 15.9                                  | 5.1 (3.2-8.2)  | 11.6                                  | 3.4 (2.0-5.9)  | 8.1                                   | 2.7 (1.0-7.6) <sup>a</sup> | 11.7                                  | 4.4 (2.1-9.1)   | 2.4                                   | 1.1 (0.2-8.9)  | 15.3                                  | 4.6 (3.2-6.6)  |
| >400                       | 27.3                                  | 8.4 (5.1-13.9) | 26.0                                  | 7.4 (4.4-12.4) | 46.8                                  | 14.8 (7.0-31.3)            | 31.0                                  | 10.5 (5.5-20.3) | 20.4                                  | 9.1 (2.0-41.8) | 27.0                                  | 7.8 (5.4-11.3) |

CAC = coronary artery calcium; CI = confidence interval; HR = hazard ratio

<sup>a</sup> 95% CI lower limit <1.0

Coronary artery disease included all coronary artery disease hospitalizations and death (ICD-10 codes I20-25), including angina pectoris and myocardial infarction

Models in patients who received left-sided or right-sided radiotherapy, and who were treated with and without anthracyclines were adjusted for age at time of CT scan and stratified by calendar year of CT scan

Models in patients who received radiotherapy with and without boost were adjusted for age at time of CT scan, laterality, treated with anthracyclines and treated with trastuzumab, and stratified by calendar year of CT scan; model included interaction between CAC and anthracyclines

**eTable 8 Risk of all-cause mortality by CAC score category, stratified by treatment (follow-up until 2018)**

| CAC score<br>(Agatston<br>units) | Left-sided<br>radiotherapy (n =<br>8,223)              |                                | Right-sided<br>radiotherapy (n =<br>7,688)             |                                | Radiation boost (n =<br>5,182)                         |                   | No radiation boost<br>(n = 5,324)                      |                   | Anthracyclines (n =<br>4,333)                          |                   | No anthracyclines (n<br>= 11,582)                      |                   |
|----------------------------------|--------------------------------------------------------|--------------------------------|--------------------------------------------------------|--------------------------------|--------------------------------------------------------|-------------------|--------------------------------------------------------|-------------------|--------------------------------------------------------|-------------------|--------------------------------------------------------|-------------------|
|                                  | Inciden<br>ce rate,<br>per<br>1000<br>person-<br>years | HR (95%<br>CI)                 | Inciden<br>ce rate,<br>per<br>1000<br>person-<br>years | HR (95% CI)                    | Inciden<br>ce rate,<br>per<br>1000<br>person-<br>years | HR (95%<br>CI)    |
| 0                                | 11.7                                                   | 1.0 (ref)                      | 10.0                                                   | 1.0 (ref)                      | 8.8                                                    | 1.0 (ref)         | 13.2                                                   | 1.0 (ref)         | 14.2                                                   | 1.0 (ref)         | 9.7                                                    | 1.0 (ref)         |
| 1-10                             | 17.1                                                   | 1.2 (1.0-<br>1.5) <sup>a</sup> | 18.3                                                   | 1.5 (1.2-1.9)                  | 11.9                                                   | 1.3 (0.8-<br>2.3) | 20.0                                                   | 1.8 (1.2-<br>2.7) | 18.0                                                   | 1.2 (0.8-<br>1.8) | 17.6                                                   | 1.4 (1.1-<br>1.7) |
| 11-100                           | 19.8                                                   | 1.2 (1.0-<br>1.5) <sup>a</sup> | 18.6                                                   | 1.3 (1.0-<br>1.6) <sup>b</sup> | 15.0                                                   | 1.5 (0.9-<br>2.5) | 17.3                                                   | 1.6 (1.1-<br>2.3) | 16.8                                                   | 1.1 (0.7-<br>1.6) | 19.7                                                   | 1.3 (1.1-<br>1.5) |
| 101-400                          | 31.2                                                   | 1.6 (1.2-<br>2.0)              | 30.4                                                   | 1.9 (1.4-2.5)                  | 21.3                                                   | 2.3 (1.3-<br>3.9) | 33.1                                                   | 2.7 (1.9-<br>4.0) | 23.8                                                   | 1.4 (0.8-<br>2.5) | 31.7                                                   | 1.8 (1.5-<br>2.2) |
| >400                             | 59.5                                                   | 2.9 (2.2-<br>3.7)              | 46.1                                                   | 2.6 (2.0-3.5)                  | 44.2                                                   | 3.9 (2.3-<br>6.8) | 52.6                                                   | 4.1 (2.9-<br>6.0) | 76.7                                                   | 4.6 (2.4-<br>8.6) | 51.4                                                   | 2.8 (2.2-<br>3.4) |

CAC = coronary artery calcium; CI = confidence interval; HR = hazard ratio

<sup>a</sup> 95% CI lower limit <1.0

<sup>b</sup> 95% CI lower limit >1.0

Models were adjusted for age at time of CT scan (natural spline with df=3) and stratified by calendar year of CT scan

Models in patients who received left-sided or right-sided radiotherapy, and who were treated with and without anthracyclines were adjusted for age at time of CT scan and stratified by calendar year of CT scan

Models in patients who received radiotherapy with and without boost were adjusted for age at time of CT scan, laterality, treated with anthracyclines and treated with trastuzumab, and stratified by calendar year of CT scan; model included interaction between CAC and anthracyclines

**eTable 9 Competing risks survival analysis of cardiovascular disease by CAC category**

| CAC score<br>(Agatston<br>units) | Subdistribution HR (95% CI) <sup>a</sup> |                            |                            |
|----------------------------------|------------------------------------------|----------------------------|----------------------------|
|                                  | Model 1                                  | Model 2                    | Model 3                    |
| 0                                | 1.0 (ref)                                | 1.0 (ref)                  | 1.0 (ref)                  |
| 1-10                             | 1.2 (1.0-1.5) <sup>b</sup>               | 1.2 (1.0-1.5) <sup>b</sup> | 1.2 (1.0-1.5) <sup>b</sup> |
| 11-100                           | 1.8 (1.5-2.1)                            | 1.8 (1.5-2.1)              | 1.8 (1.5-2.1)              |
| 101-400                          | 2.2 (1.8-2.7)                            | 2.2 (1.8-2.7)              | 2.2 (1.8-2.6)              |
| >400                             | 3.5 (2.9-4.3)                            | 3.5 (2.8-4.3)              | 3.4 (2.8-4.2)              |

CAC = coronary artery calcium; CI = confidence interval; HR = hazard ratio; ref = reference

<sup>a</sup> Competing risk survival analysis as described by Fine and Gray (Fine 1999 J Am Stat Assoc) provides subdistribution hazard ratios.

<sup>b</sup> 95% CI lower limit >1.0

Cardiovascular disease included all cardiovascular disease hospitalizations and death (ICD-10 codes I00-199, Lymphedema and varicose veins excluded (I88-89 and I83-86 respectively))

All models were adjusted for age at time of CT scan and stratified by calendar year of CT scan

Model 1: competing risk was all-cause mortality

Model 2: competing risk was cancer hospitalization

Model 3: competing risks were all-cause mortality and cancer hospitalization

**eFigure 1 Cumulative incidence curves for CVD by CAC category in the presence of competing risks (Aalen-Johansen estimates and 95% intervals)**

Cardiovascular disease included all cardiovascular disease hospitalizations and death (ICD-10 codes 100-199, Lymphedema and varicose veins excluded (I88-89 and I83-86 respectively)). CAC = coronary artery calcium

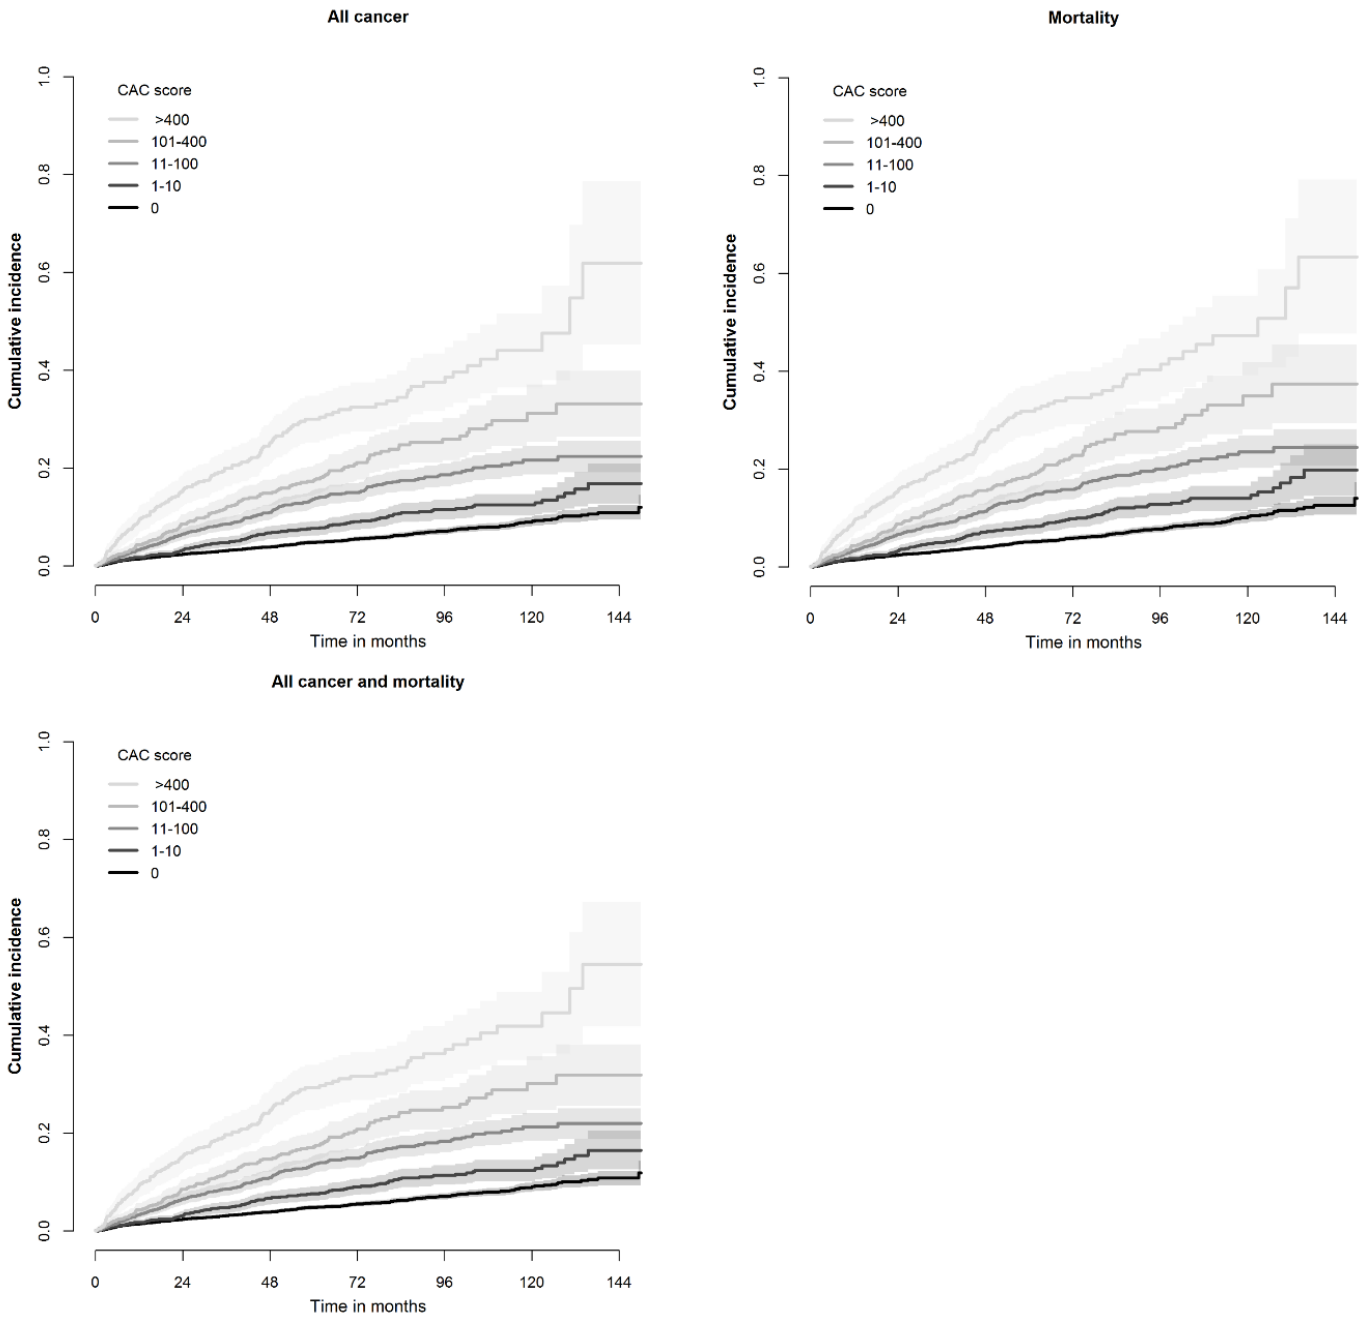

Supplement: jamaoncol-e211144-s001.pdf [file jamaoncol-e211144-s001.pdf]
